# Supplementary material for: Replication timing networks reveal a link between transcription regulatory circuits and replication timing control
Source: HighWire-hosted journal article supplement (doi:10.1101/gr.247049.118), 2019-08-21
Supplement: SupplementalCode.zip [file Top genes per differentiation pathway.xlsx]

## Sheet: Description
	This file contains the ranked genes (p-value) differentially expressed in each pathway
	Genes in RED are transcription factors, grey genes are not annotated as TFs

## Sheet: TopGenes
hESC	DE	Liver_D5	Liver_D8	Liver_D16	Panc_D5	Panc_D8	Panc_D12	LPM	Splanch	Mesothel	SM	NPC	NC	MSC
AASS	MOBP	TRPM6	HLA-DPB1	FOXA1	LGI2	ARMC3	PDX1	SGCG	DMRT1	TBX4	WFDC1	BHMT	ROPN1	SRGN
IDO1	SLC36A2	GPR55	RGAG1	NR2F2	ETNPPL	TEKT1	INSM1	MYL10	SESN3	PLAC1	EGFL6	TRPM3	ROPN1B	LOC645638
PHC1	CER1	SLC28A2	C4orf17	HNF4G	SLC10A4	CAPSL	ONECUT1	CLDN10	ART5	ADAMTS9	PROK1	TMEFF2	FOXD2	CAV1
HTR3A	UNC79	PEG10	LOC646168	CREB3L3	DGKB	PTH2R	TRIM50	AMER2	PRSS12	CYP26B1	COL15A1	MMRN1	CLEC1A	G6PD
SMPDL3B	FZD8	TNFRSF11A	GADL1	EBF4	ATOH1	WDR16	PROX1	NACC2	RIMS2	CFI	TGFBR3	VSX2	MIA	THBS2
HHLA2	FAM159B	MXI1	ADH1B	ZNF467	PAQR9	DAW1	IRF8	GRHL3	CASQ2	MMP11	ATP8B4	ASTN1	TRIL	NGF
LECT1	NLRP9	COCH	MYO9A	CEBPA	EEF1DP3	NPL	MEIS1	HMSD	PAQR8	TSPAN1	CXCL14	KCNAB1	FOXD2-AS1	MGLL
POLR3G	EOMES	ARHGAP24	NMUR1	LGALS3	PTGDR	C9orf117	KIF19	ANKRD55	ACPP	HTR2B	NFKBIZ	FOXE3	C1QTNF4	GREM1
USP44	SLC35F3	ALAS2	FAM19A4	PROX1	PDYN	TCTEX1D1	ONECUT2	NPFFR2	C1orf105	DHRS3	SPRR3	DAPL1	PRELP	COL8A1
VASH2	ACSM4	CDH12	LAMA1	ONECUT1	EPHA6	ABCA6	NEUROG3	TTC29	TG	TNFAIP8L3	MC1R	CCK	MEOX2	CSPG4
C12orf56	GPR151	OTOGL	GPR88	PPARA	SKA1	RSPH4A	NEUROD1	HPGD	SOWAHA	ZDHHC8P1	OSR1	KLHL14	SOX10	F2RL2
ZSCAN10	RP5-884G6.2	RAI2	AKR1B15	CDX2	IGSF21	ZNF474	MECOM	GPRIN3	GLB1	ALX3	SERPINB13	SIX6	EYA1	VGLL3
CHST4	CD48	GPATCH2L	RSPO3	ZNF189	KLK11	C1orf192	PAX4	CA12	KRT16P1	CLUL1	MFAP4	AJ006998.2	NGFR	ITGA11
CAPN11	MYCT1	SEMA3G	GPX2	ONECUT2	NDNL2	PGA3	MLXIPL	NPFF	CLEC1B	PITX1	CHRDL2	SOSTDC1	NCR3LG1	STK32B
CR2	FREM1	TRIM17	KCNJ16	GLIS3	TAC3	FOXJ1	RFX6	TPTE2P6	MMP28	CES5AP1	SLITRK6	DCT	APOD	PRKCA
CYP2F1	APOBEC3G	PODN	PDE5A	SOX9	RIPPLY3	ENKUR	PTF1A	DUSP2	SOX7	MOXD1	CLCA2	PLEKHG4B	CPED1	MBNL1
PRDM14	GSC	TMEM27	SPTLC3	PRDM16	COL4A6	PGA5	NR5A2	GALNT13	ENPP6	ZFPM1	OGN	WNT2B	C3orf70	FOXS1
DPPA4	MIXL1	P2RX2	CHIA	RXRA	GRB14	LINC00305	NKX6-2	SLC3A2	HTR1E	CRHBP	SVEP1	CTNNA2	NEFM	MAP3K7CL
LCK	SSX4B	SORCS1	CREB3L3	EEPD1	CYP4A11	ZMYND10	NKX2-2	LRRC3B	CLCN5	PTGIS	KRT14	HSD17B2	SLC8A3	FOSL1
FAM46B	FGF17	ARHGAP28	GABRA2	ANGPTL3	MOK	SPATA17	LBX2	LINC00997	DNAH2	FAM163A	EGFLAM	PAX6	PHACTR3	FBN1
RASGRP2	LHX1	NRCAM	AMBN	ASGR2	UGT3A2	WDR63	MAFB	FABP5	KRT16	PTPRB	ZBED2	SFRP2	CDH19	COL5A3
FAM124B	LIMD1-AS1	C16orf11	ADRA1A	ITIH2	GLYATL2	ROPN1L	FOXA1	CDX1	DLX5	ADRB3	SLC2A10	OPCML	ATP1A2	CCDC80
ERVMER34-1	NR0B1	CST1	RNASE1	SERPINF2	PAQR5	MAK	HNF1B	GCLM	DOK4	PRICKLE1	LRFN5	ATP6V1B1	TNFRSF19	GPC1
UGP2	GNAL	FSHR	CUBN	C4BPB	NKX2-3	CASC1	ASCL2	PYCARD	SLC4A8	HOXA9	CRISPLD2	SNCA	MSTN	COL12A1
PIM2	MLYCD	SH3GL2	WEE2	TM4SF5	STK31	C1orf158	FEV	ANXA2R	KRT16P3	NRK	ENDOD1	RP11-89K21.1	NFATC3	MAP1A
SEPHS1	PLXNA2	IGFL3	WNT11	FTCD	GRIP2	DYNLRB2	FSTL5	MSX1	CAMK1G	CDKN2A	COMP	PI15	NR2F1	NTN4
CKMT1B	CNGA4	DIO2	LRMP	HOGA1	LPPR1	RSPH1	CAMK2B	OAT	SDK1	SMIM3	HGF	LHX2	DOCK10	ADAM15
ZDHHC19	CCDC81	PPFIBP2	ESRRG	HPX	DOK6	NEK11	CELA3A	RASSF9	MPZL1	PLK2	LAMA2	STX19	PCBP4	STARD13
PPM1B	SOX17	SLC39A8	NR3C2	AHSG	CRTAC1	CCDC19	GFRA3	PHKA1	PLA2G2A	CYP24A1	KRT17	ASIP	LGI4	EDIL3
KCND2	MANEA	TMPRSS2	SLC7A7	FGA	FMO2	VWA3A	RAPGEF4	ATR	CREG1	LOC101927953	NLRP3	VAV3	TFAP2B	FN1
ZNF398	CALCR	BMPER	PRODH2	AGT	ZNF550	MORN5	SCGN	SLC7A5	SLC15A1	CDKN2B	SMCO3	FOXG1	SCML1	SH3RF3
CPNE9	LRRC3	POC1B	TUBB4A	LIPC	LINC00479	TEKT2	RAB26	NOTUM	TGM1	NFIB	CEBPD	KMO	ADAM11	FLNA
HLA-DPB2	MRPL22	GRP	MITF	CPB2	CYP4X1	C6orf165	CHGA	DCAF13P3	CSF1R	TBX2	TNNT3	GPA33	RPL28	IGFBP4
JARID2	FBXO34	ZDHHC23	GABRB1	PDX1	COL19A1	NPY5R	RGS7	TMPRSS11E	CHI3L2	SNCAIP	CCDC85A	NRIP1	CPXM1	KCNMA1
TERF1	PRDM1	COL9A2	XX-FW80269A6.1	FOXA2	FMO4	FAM134A	C11orf87	DLX6	RGS13	GNG8	SOCS3	PMEL	DKFZP434L187	LACTB
EPHA1	GPSM2	PAPSS1	AOX1	TP53INP1	ZNF765	TTC25	CLPS	SGK1	LGALS16	OR51E2	MMP23B	ALDH1A3	DNHD1	EVA1A
DNMT3B	LEFTY1	PLLP	HMGCS2	SEC14L2	FRY	SPAG6	THSD4	FAM20A	ATP2B1	HOXB13	CMKLR1	C8orf47	GGA1	RUNX2
ZNF883	SLC22A15	PGM1	PRR5	ZBED3	ROBO2	LRRIQ1	RIMBP2	LINC00545	FGFBP1	ARSI	REG4	TMEM178A	RNASEH2C	CORO1C
GLS2	ME2	GTPBP8	HNF1B	NR5A2	HHEX	DNAH7	KCNJ6	ABCG2	CHRD	HOXD11	PTPRR	CYFIP2	FAM162B	IL15
SEMG1	ANKDD1A	B3GNT4	IL6R	NR2E3	ID4	TTC18	CRH	MYRFL	LINC00936	SCN2B	LTBR	EFEMP1	BCHE	MPP4
SNRPN	ACOX3	COL19A1	ZNF630	DENND4A	ZSCAN12	LINC00930	KCNK17	LOC729444	RASGRP1	GBP1	DUOXA1	MAMDC2	EBF1	CPA4
CYP2S1	APOL3	SYTL5	CAMTA1	FXYD2	AGL	SIM1	SLC4A4	TRIML2	FUT8	TCF21	IL1R1	GAS1	SASH1	ITGB7
FOXD3	ROR2	RASL12	FAM20C	SERPINC1	ZNF615	TMEM171	NPHS1	LPAR5	STOM	MYRF	PAGE4	ISYNA1	GPHN	CRIM1
C9orf129	SAMD3	MIRLET7I	FAM179A	KNG1	PPAPDC2	ENO4	GAD2	PRODH	DLX6-AS1	LTBP3	CILP	OTX1	SEPSECS	AC068491.1
CCDC172	CXCR4	HRK	GOLGA2P5	SERPINA11	PCDH17	DPP6	SCGB1A1	DCLK1	ANKS1A	C8orf31	COL8A2	NDST4	MLANA	SFTA1P
PAK1	PACSIN1	DEPDC7	KRT222	SLC3A1	FAM189A1	CCDC37	KIRREL2	GSTO1	SLK	GAPT	RSPO2	RELN	PAX8	PRSS23
SNORD109B	ZNF792	DENND2C	FCN3	AGXT	EXOC6	HYDIN	KCNK16	RBBP8NL	HAPLN1	SPRR2F	S100A4	DCBLD2	GLCE	AK5
RASD2	ATPAF2	OVOL2	HABP2	ANXA13	SEMA3E	CRYM	KCNH3	GPR83	ENTPD4	CXCL12	PTGES	ZNF185	NID1	OLFML1
TNFRSF8	BHLHE22	PROS1	SH3RF2	C6	CCDC34	DNAAF3	GUCA2B	NAP1L3	FUT8-AS1	KCNE4	ADRA1B	TRPV6	PIK3R3	DRAP1
RP11-436H22.1	KLF8	RYR3	HELZ	ALDOB	NSMAF	LRRC9	PCSK1	PPP1R2	C11orf96	FNDC5	GABRE	KCNJ4	EBF2	IL7R
CDCA7L	UBAP2	KDM7A	GCGR	CYP3A7	ZNF432	GALR2	SV2B	NAV2	MTUS2	RARB	LOC154761	PLEKHG1	CSPG5	ABTB1
USP9X	SLC5A9	PXK	HSPA12A	ARG1	CBX7	PIFO	CRYBA2	PRAC2	GOLM1	SMYD3	CAPNS2	NUTM2D	DLL3	CD44
CHP2	BATF3	ZNF765	HLA-DPA1	ITIH1	HIBADH	GPR37L1	INS	WLS	ACTC1	CST2	LUM	CPAMD8	LEF1	COL6A2
RBM3	LEFTY2	ZFY	UGT3A1	HAL	VWA5A	MLLT1	ABCC8	NIPA2	PSTPIP2	DISP1	FXYD3	SPHK1	MMAB	ECM1
PRKCB	LRRC2	SOX18	PDZD3	SLC22A9	TXNDC16	EFHC1	SCTR	FOXF2	ZNF552	UBA7	NR4A3	MUC19	FAM212A	PTRF
PROK2	C2orf88	KLF15	FZD4	NPSR1-AS1	ALDH2	RFX2	SDR9C7	AF131216.5	AFAP1L2	PDE7B	FOSB	TYRP1	CNRIP1	SIX1
SLC6A15	ZSWIM5	ZNF611	PITX2	SERPINA7	ZNF826P	ISX	FFAR2	MKX	HEY1	ANO7	ATF3	WNT1	SLITRK5	LMO7
TXLNG	SLC35A3	HEY2	NR4A2	AADAC	DCP1A	NEUROG3	GCH1	JDP2	MSX2	HOXD10	TP63	PCDH7	FMNL3	MYBL1
RBPJ	LRIG3	DMBX1	ZNF124	RBP2	PRKD1	LMO3	LINC00607	DNMT3L	ISL1	IFIT3	KCNIP3	FAM217B	DMRT2	TGFB1I1
RP11-146I2.1	NODAL	SMAD9	KLF5	OTC	SLC40A1	ZBTB7C	CNGA3	SAP30L	HAND1	ST6GALNAC3	RNF112	LMX1A	FADS2	AHR
ZBTB44	UNC50	NFATC1	AFF2	AGR2	GYG2P1	HOXA1	NDFIP1	TFAP2C	TAF10	MFRP	JUNB	DBX2	TFAP2D	AEBP1
ZNF483	FZD5	ZNF701	OSR2	ORM2	NKX3-1	MLXIPL	CLEC4G	BRMS1	IRX6	XRCC4	FOXF1	NARG2	CMTM7	MSC
ZNF589	ANKS1B	ZNF432	ZNF69	ACMSD	OVOL2	CCDC96	MNX1	CDX2	GRHL1	MLLT10	ZBTB47	THAP10	MVK	HSF2BP
ZNF485	IKZF5	NKX2-5	FAM193B	UGT2B11	ZNF614	TAF1A	ST18	MESP1	DLX6	EDN3	TRAK1	DACH2	POU4F1	KLF2
POU5F1B	GATA6	HLX	CRY2	PLG	ASH2L	KIF19	IRF2BP2	CENPA	GCM1	H2AFY	BATF	EMX2	CAPN3	FOXC2
POU5F1	ZNF296	ZNF28	FOSL2	ORM1	BRD7	PHTF1	ELF1	HAND1	SMARCA2	SMAD3	EGR1	DMRT3	ZNRD1	AR
JMJD1C	EYA2	RXRG	MAF	CYP4F3	ZNF454	ZNF214	JADE3	PDCD2	SAP30L	CRABP2	RPS6KA4	SOX3	EZH2	AFF3
ZNF770	GTF2I	WTIP	FBXO38	SERPINA6	AATF	TRIM50	ERO1LB	TFAP2A	NKX2-3	GATA5	ZNF641	DMRTA2	MEF2C	HMGA2
CEBPZ	ZBTB8A	TGIF1	RXRA	HGD	ZNF761	EHF	TEX11	C19orf40	NR6A1	HOXA13	TBC1D2B	VAX2	POU4F2	PRRX1
ZBTB3	HIST1H2BH	SMAD6	ERF	HPR	SCAND3	MKL2	MIR7-3HG	ZNF197	EPAS1	HOXA11	ELF4	RAD23B	POLR1E	FOXP1
TCF7L1	AFF1	MED7	HNF4G	HRG	ZNF250	TBPL1	ACOT7	TEAD4	CDX2	HOXA10	HIST2H2AA3	PEG3	TLX2	SP100
PIAS2	BANF1	ZNF654	TFCP2L1	PLGLB1	PER2	ZNF184	MSMB	FOXM1	ZBTB25	IRF9	ZBTB4	IFT57	PHOX2B	NCOR2
EAF2	THAP1	ZNF761	NFE2L2	GP2	MYCN	RFX6	ARX	KHSRP	MSRB2	TRIM31	FOS	BARHL1	TWIST2	SNAPC1
ZSCAN2	ASH2L	TWISTNB	STAG1	C8A	ZNF415	KRBA2	BEX5	GAS7	POLR2C	HOXA4	FOXJ2	ZNF706	NFKBIE	HIF1A
ZNF525	ZNF101	GATA3	SCAND3	C4BPA	ZNF611	CITED4	COL28A1	ELF2	MSX1	FHL3	NR3C1	ZNF529	MEOX1	TIPARP
DPPA2	ZNF613	ZNF614	RFX6	FGL1	ZNF813	FOXA1	FGF14	ID1	ZNF277	CDR2	HIST2H2AC	FEZF2	UHRF1	PER1
PPRC1	ETV3	CBX7	FOXA1	HP	TGIF2	ZNF3	EIF3C	ALYREF	GATA2	MKL1	HIST1H1C	RBM23	PDS5B	MED8
ZNF814	ZNF48	MYPOP	RORA	NR0B2	ZNF573	RFX3	SYP	SP6	TFAP2A	LYL1	ZNF395	EP400	SOX6	DLX1
ZNF721	ZNF614	ZNF682	KDM4C	NR1H4	KLF12	APITD1	GALR1	CDYL	TFAP2C	HIVEP1	ZSCAN4	HMGN2	NEUROG1	CXXC5
MYBBP1A	MSH6	ZNF615	PPARD	NR1I3	ZNF146	MNX1	GPR119	XRCC6	MAFB	SP110	EPAS1	REC8	SOX12	RBCK1
LHX6	ZNF341	POT1	ZNF781	ATF7IP	FOXA2	ZSCAN18	STAT4	WDR5	CDX1	DDX60	JUN	TRIM45	SOX8	PSMB9
AEBP2	RNF113A	ID1	ZBED3	ATF5	SMAD5	ZNF345	TLE6	TFDP1	BNC1	H2AFJ	OVOL1	CTBP1	FOXI2	TMF1
LYAR	SSBP3	GATA4	ZNF711	NR1H3	ZNF280B	ZFPM2	XBP1	SGOL1	ZHX2	NCOA7	ZNF524	MCM3AP	PIR	ERCC6
YBX2	ZKSCAN2	CGGBP1	LUZP1	TLE1	SALL1	NFE2L3	ELL2	RAD51	GABPB1	STAT3	RUNX1	TRIM33	FANCE	MBTPS2
ZNF197	TBL1XR1	SCAND3	FOXN2	MPV17L	UBE2I	FOXA2	LIG4	ZNF552	ZNF433	SCMH1	HOXA11	TRIP12	ZNF385C	HCFC2
HELLS	SRY	ZNF285	TBL1X	NKX6-2	ZBTB16	PIBF1	NFE2L3	ZNF433	HOXB6	IFI16	CEBPB	CNOT1	RAD9A	THRA
SPIB	TCERG1L	CBFB	SMAD6	HIST1H2AC	KLF15	ZNF664	STAT1	H2AFZ	ARID3A	LMO2	PLAG1	RAX	TCF15	CHD3
ZNF239	ZNF18	SALL1	EAF1	SMC3	TWISTNB	ZNF235	NFE2	HIST1H3G	ZNF672	YAF2	ZNF175	ZNF84	ETV2	ZFPL1
PSIP1	ZNF138	ISL1	CREB3L2	STAT1	ZBTB39	SOX4	ZMIZ2	ZW10	CDK9	MXD1	KLF4	MECP2	HN1L	AIP
CD3EAP	AATF	TCF20	HIPK2	TBL1X	SMAD9	ZNF154	KLHDC2	POU5F1	PPARG	NUPR1	STAT2	CAND1	ZNF155	PKNOX2
ZNF57	TGIF1	ZNF280B	GATA4	GMCL1	ZNF627	FOXJ3	E2F6	TFAM	HOPX	ZNFX1	HIST2H2AA4	HTT	TBX15	SON
MED14	ZIC2	FOXA3	ZNF431	NFE2	TFCP2L1	ZSCAN16	HEY1	HTATIP2	ATF6	ID3	H2AFJ	ZFAND5	PBX4	MAFG
ZFP42	PHF10	GTF2H5	ZFY	FOXA3	RXRA	ETS2	LMO3	ILF2	PBX1	RXRB	JUP	SP3	DIP2A	SNAI2
	RFWD2	ZNF519	SETD2	KLHDC2	TCEA2	LBX2	SRY	TCEB3	ID1	HOXA5	PHF11	CENPF	TWIST1	BLVRA
	CDC40	PRDM1	ID2	SLC2A4RG	BRD3	BAZ2B	PHTF1	KBTBD8	RFXANK	ZFPM2	VGLL1	ZBTB16	EBF3	FOXK1
	TEAD2	MED30	ZNF91	STAT4	KDM1A	ZNF165	MORF4L1	DLX5	WWTR1	ZNF827	HAND2	ZNF10	AFF2	PHF20
	BTBD10	MYCN	ZNF768	RTKN	HNF4G	MECOM	HSBP1	ZFP42	ID2	SMARCD3	FOXQ1	BRD8	ZCCHC14	RC3H2
	TRIM32		ZMYM3	HIST1H2BD	FOXA3	DACH1	ANKS1B			HOXB7	KLF6	ZNF606	BAZ1A	KLF9
	HEXIM2		HHEX	FBXO38	NFXL1	IRF8	MZF1			MEIS2	ETS2	H1FX	BMI1	NPAS2
	GMEB1		PRDM15	FOXN2	MXI1		FOXA2			CALCOCO1	BHLHE40	TP53BP1		NFIC
				ZFP36L2			THAP2
				KLF15			TOX

## Sheet: Only TFs
hESC	DE	Liver_D5	Liver_D8	Liver_D16	Panc_D5	Panc_D8	Panc_D12	LPM	Splanch	Mesothel	SM	NPC	NC	MSC
POLR3G	EOMES	MXI1	CREB3L3	FOXA1	ATOH1	ZNF474	PDX1	GRHL3	DMRT1	TBX4	NFKBIZ	VSX2	FOXD2	FOXS1
ZSCAN10	GSC	OVOL2	ESRRG	NR2F2	NKX2-3	FOXJ1	INSM1	CDX1	SOX7	ALX3	OSR1	FOXE3	MEOX2	FOSL1
PRDM14	MIXL1	ZNF765	NR3C2	HNF4G	ZNF550	RSPH1	ONECUT1	MSX1	DLX5	PITX1	ZBED2	SIX6	SOX10	RUNX2
ZNF398	SSX4B	ZFY	MITF	CREB3L3	ZNF765	SIM1	TRIM50	DLX6	CREG1	ZFPM1	CEBPD	PAX6	EYA1	DRAP1
JARID2	LHX1	SOX18	HNF1B	EBF4	HHEX	MLLT1	PROX1	NAV2	ZNF552	HOXA9	NR4A3	LHX2	NFATC3	PTRF
TERF1	NR0B1	KLF15	ZNF630	ZNF467	ID4	RFX2	IRF8	FOXF2	AFAP1L2	CDKN2A	FOSB	FOXG1	NR2F1	SIX1
DNMT3B	SOX17	ZNF611	PITX2	CEBPA	ZSCAN12	ISX	MEIS1	MKX	HEY1	NFIB	ATF3	NRIP1	TFAP2B	LMO7
FOXD3	PRDM1	HEY2	NR4A2	LGALS3	ZNF615	NEUROG3	KIF19	JDP2	MSX2	TBX2	TP63	OTX1	SCML1	MYBL1
CDCA7L	ZNF792	DMBX1	ZNF124	PROX1	ZNF432	LMO3	ONECUT2	DNMT3L	ISL1	HOXB13	KCNIP3	ZNF185	EBF1	TGFB1I1
RBPJ	BHLHE22	SMAD9	KLF5	ONECUT1	CBX7	ZBTB7C	NEUROG3	SAP30L	HAND1	HOXD11	RNF112	LMX1A	PAX8	AHR
ZBTB44	KLF8	NFATC1	AFF2	PPARA	DCP1A	HOXA1	NEUROD1	TFAP2C	TAF10	TCF21	JUNB	DBX2	EBF2	AEBP1
ZNF483	BATF3	ZNF701	OSR2	CDX2	NKX3-1	MLXIPL	MECOM	BRMS1	IRX6	RARB	FOXF1	NARG2	LEF1	MSC
ZNF589	ANKS1B	ZNF432	ZNF69	ZNF189	OVOL2	CCDC96	PAX4	CDX2	GRHL1	HOXD10	ZBTB47	THAP10	DMRT2	HSF2BP
ZNF485	IKZF5	NKX2-5	FAM193B	ONECUT2	ZNF614	TAF1A	MLXIPL	MESP1	DLX6	MLLT10	TRAK1	DACH2	TFAP2D	KLF2
POU5F1B	GATA6	HLX	CRY2	GLIS3	ASH2L	KIF19	RFX6	CENPA	GCM1	H2AFY	BATF	EMX2	POU4F1	FOXC2
POU5F1	ZNF296	ZNF28	FOSL2	SOX9	BRD7	PHTF1	PTF1A	HAND1	SMARCA2	SMAD3	EGR1	DMRT3	ZNRD1	AR
JMJD1C	EYA2	RXRG	MAF	PRDM16	ZNF454	ZNF214	NR5A2	PDCD2	SAP30L	CRABP2	RPS6KA4	SOX3	EZH2	AFF3
ZNF770	GTF2I	WTIP	FBXO38	RXRA	AATF	TRIM50	FOXA1	TFAP2A	NKX2-3	GATA5	ZNF641	DMRTA2	MEF2C	HMGA2
CEBPZ	ZBTB8A	TGIF1	RXRA	EEPD1	ZNF761	EHF	HNF1B	C19orf40	NR6A1	HOXA13	TBC1D2B	VAX2	POU4F2	PRRX1
ZBTB3	HIST1H2BH	SMAD6	ERF	PDX1	SCAND3	MKL2	NKX2-2	ZNF197	EPAS1	HOXA11	ELF4	RAD23B	POLR1E	FOXP1
TCF7L1	AFF1	MED7	HNF4G	FOXA2	ZNF250	TBPL1	NKX6-2	TEAD4	CDX2	HOXA10	HIST2H2AA3	PEG3	TLX2	SP100
PIAS2	BANF1	ZNF654	TFCP2L1	NR5A2	PER2	ZNF184	ASCL2	FOXM1	ZBTB25	IRF9	ZBTB4	IFT57	PHOX2B	NCOR2
EAF2	THAP1	ZNF761	NFE2L2	NR2E3	MYCN	RFX6	FEV	KHSRP	MSRB2	TRIM31	FOS	BARHL1	TWIST2	SNAPC1
ZSCAN2	ASH2L	TWISTNB	STAG1	TP53INP1	ZNF415	KRBA2	LBX2	GAS7	POLR2C	HOXA4	FOXJ2	ZNF706	NFKBIE	HIF1A
ZNF525	ZNF101	GATA3	SCAND3	ZBED3	ZNF611	CITED4	MAFB	ELF2	MSX1	FHL3	NR3C1	ZNF529	MEOX1	TIPARP
DPPA2	ZNF613	ZNF614	RFX6	NR0B2	ZNF813	FOXA1	ELF1	ID1	ZNF277	CDR2	HIST2H2AC	FEZF2	UHRF1	PER1
PPRC1	ETV3	CBX7	FOXA1	NR1H4	TGIF2	ZNF3	IRF2BP2	ALYREF	GATA2	MKL1	HIST1H1C	RBM23	PDS5B	MED8
ZNF814	ZNF48	MYPOP	RORA	NR1I3	ZNF573	RFX3	ST18	SP6	TFAP2A	LYL1	ZNF395	EP400	SOX6	DLX1
ZNF721	ZNF614	ZNF682	KDM4C	ATF7IP	KLF12	APITD1	MNX1	CDYL	TFAP2C	HIVEP1	ZSCAN4	HMGN2	NEUROG1	CXXC5
MYBBP1A	MSH6	ZNF615	PPARD	ATF5	ZNF146	MNX1	ARX	XRCC6	MAFB	SP110	EPAS1	REC8	SOX12	RBCK1
LHX6	ZNF341	POT1	ZNF781	NR1H3	FOXA2	ZSCAN18	STAT4	WDR5	CDX1	DDX60	JUN	TRIM45	SOX8	PSMB9
AEBP2	RNF113A	ID1	ZBED3	TLE1	SMAD5	ZNF345	TLE6	TFDP1	BNC1	H2AFJ	OVOL1	CTBP1	FOXI2	TMF1
LYAR	SSBP3	GATA4	ZNF711	MPV17L	ZNF280B	ZFPM2	XBP1	SGOL1	ZHX2	NCOA7	ZNF524	MCM3AP	PIR	ERCC6
YBX2	ZKSCAN2	CGGBP1	LUZP1	NKX6-2	SALL1	NFE2L3	ELL2	RAD51	GABPB1	STAT3	RUNX1	TRIM33	FANCE	MBTPS2
ZNF197	TBL1XR1	SCAND3	FOXN2	HIST1H2AC	UBE2I	FOXA2	LIG4	ZNF552	ZNF433	SCMH1	HOXA11	TRIP12	ZNF385C	HCFC2
HELLS	SRY	ZNF285	TBL1X	SMC3	ZBTB16	PIBF1	NFE2L3	ZNF433	HOXB6	IFI16	CEBPB	CNOT1	RAD9A	THRA
SPIB	TCERG1L	CBFB	SMAD6	STAT1	KLF15	ZNF664	STAT1	H2AFZ	ARID3A	LMO2	PLAG1	RAX	TCF15	CHD3
ZNF239	ZNF18	SALL1	EAF1	TBL1X	TWISTNB	ZNF235	NFE2	HIST1H3G	ZNF672	YAF2	ZNF175	ZNF84	ETV2	ZFPL1
PSIP1	ZNF138	ISL1	CREB3L2	GMCL1	ZBTB39	SOX4	ZMIZ2	ZW10	CDK9	MXD1	KLF4	MECP2	HN1L	AIP
CD3EAP	AATF	TCF20	HIPK2	NFE2	SMAD9	ZNF154	KLHDC2	POU5F1	PPARG	NUPR1	STAT2	CAND1	ZNF155	PKNOX2
ZNF57	TGIF1	ZNF280B	GATA4	FOXA3	ZNF627	FOXJ3	E2F6	TFAM	HOPX	ZNFX1	HIST2H2AA4	HTT	TBX15	SON
MED14	ZIC2	FOXA3	ZNF431	KLHDC2	TFCP2L1	ZSCAN16	HEY1	HTATIP2	ATF6	ID3	H2AFJ	ZFAND5	PBX4	MAFG
ZFP42	PHF10	GTF2H5	ZFY	SLC2A4RG	RXRA	ETS2	LMO3	ILF2	PBX1	RXRB	JUP	SP3	DIP2A	SNAI2
	RFWD2	ZNF519	SETD2	STAT4	TCEA2	LBX2	SRY	TCEB3	ID1	HOXA5	PHF11	CENPF	TWIST1	BLVRA
	CDC40	PRDM1	ID2	SEC14L2	BRD3	BAZ2B	PHTF1	KBTBD8	RFXANK	ZFPM2	VGLL1	ZBTB16	EBF3	FOXK1
	TEAD2	MED30	ZNF91	RTKN	KDM1A	ZNF165	MORF4L1	DLX5	WWTR1	ZNF827	HAND2	ZNF10	AFF2	PHF20
	BTBD10	MYCN	ZNF768	HIST1H2BD	HNF4G	MECOM	HSBP1	ZFP42	ID2	SMARCD3	FOXQ1	BRD8	ZCCHC14	RC3H2
	TRIM32		ZMYM3	FBXO38	FOXA3	DACH1	ANKS1B			HOXB7	KLF6	ZNF606	BAZ1A	KLF9
	HEXIM2		HHEX	FOXN2	NFXL1	IRF8	MZF1			MEIS2	ETS2	H1FX	BMI1	NPAS2
	GMEB1		PRDM15	ZFP36L2	MXI1	HNF1B	FOXA2			CALCOCO1	BHLHE40	TP53BP1		NFIC
			FOXA2	KLF15			THAP2
				DENND4A			TOX
